# Supplementary material
Source: MDPI journal article supplement (https://www.mdpi.com/search?q=diversity-11-00074)
Supplement: s001 [file diversity-11-00074-s001.pdf]

# Comparative Analysis of Mollusc Assemblages from Different Hard Bottom Habitats in the Central Tyrrhenian Sea

Edoardo Casoli <sup>1</sup>, Andrea Bonifazi <sup>2</sup>, Giandomenico Ardizzone <sup>1</sup>, Maria Flavia Gravina <sup>2,3</sup>, Giovanni Fulvio Russo <sup>3,4</sup>, Roberto Sandulli <sup>3,4</sup> and Luigia Donnarumma <sup>3,4,\*</sup>

<sup>1</sup> Department of Environmental Biology, "Sapienza" University of Rome, Rome 00185, Italy; edoardo.casoli@uniroma1.it (E.C.); giandomenico.ardizzone@uniroma1.it (G.A.)

<sup>2</sup> Department of Biology, "Tor Vergata" University of Rome, Rome 00133, Italy; bonifazi.andrea@virgilio.it (A.B.); maria.flavia.gravina@uniroma2.it (M.F.G.)

<sup>3</sup> CoNISMa (National Interuniversity Consortium for Marine Sciences), 00196 Rome, Italy; giovanni.russo@uniparthenope.it (G.F.R.); roberto.sandulli@uniparthenope.it (R.S.)

<sup>4</sup> Department of Science and Technology, "Parthenope" University of Naples, Naples 80143, Italy

\* Correspondence: luigia.donnarumma@uniparthenope.it; Tel.: +39-081-547-6530.

## Supplementary material

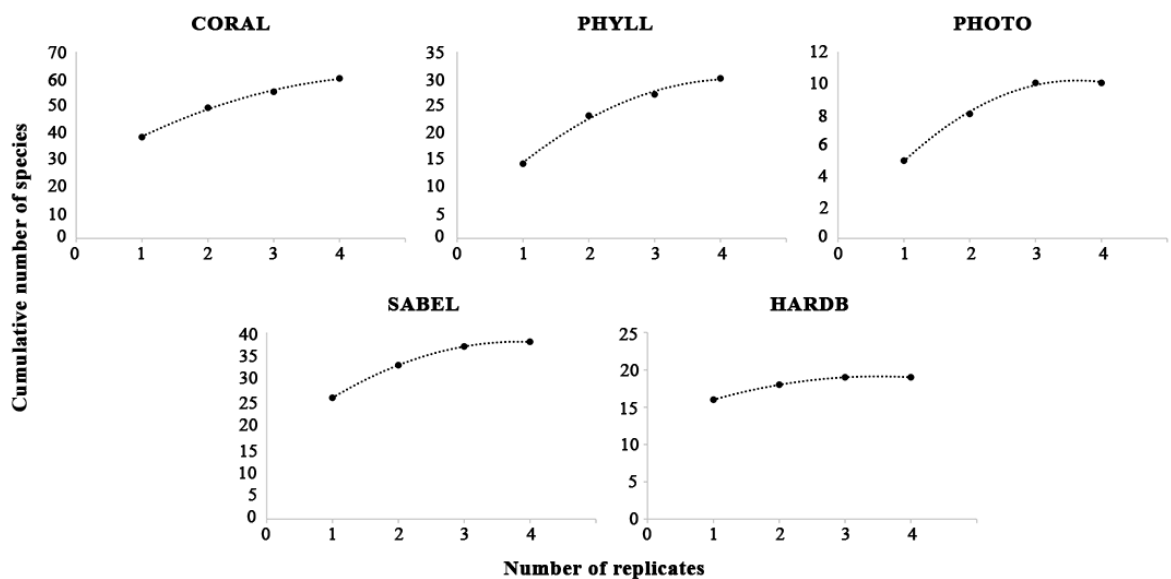

**Figure S1.** Cumulative species-area curve for each habitat (CORAL - coralligenous concretion; PHYLL - *P. crispata* sciaphilic assemblage; PHOTO - shallow photophilic assemblage; SABEL - *S. alveolata* reef; HARDB - hard bottom with photophilic algae).

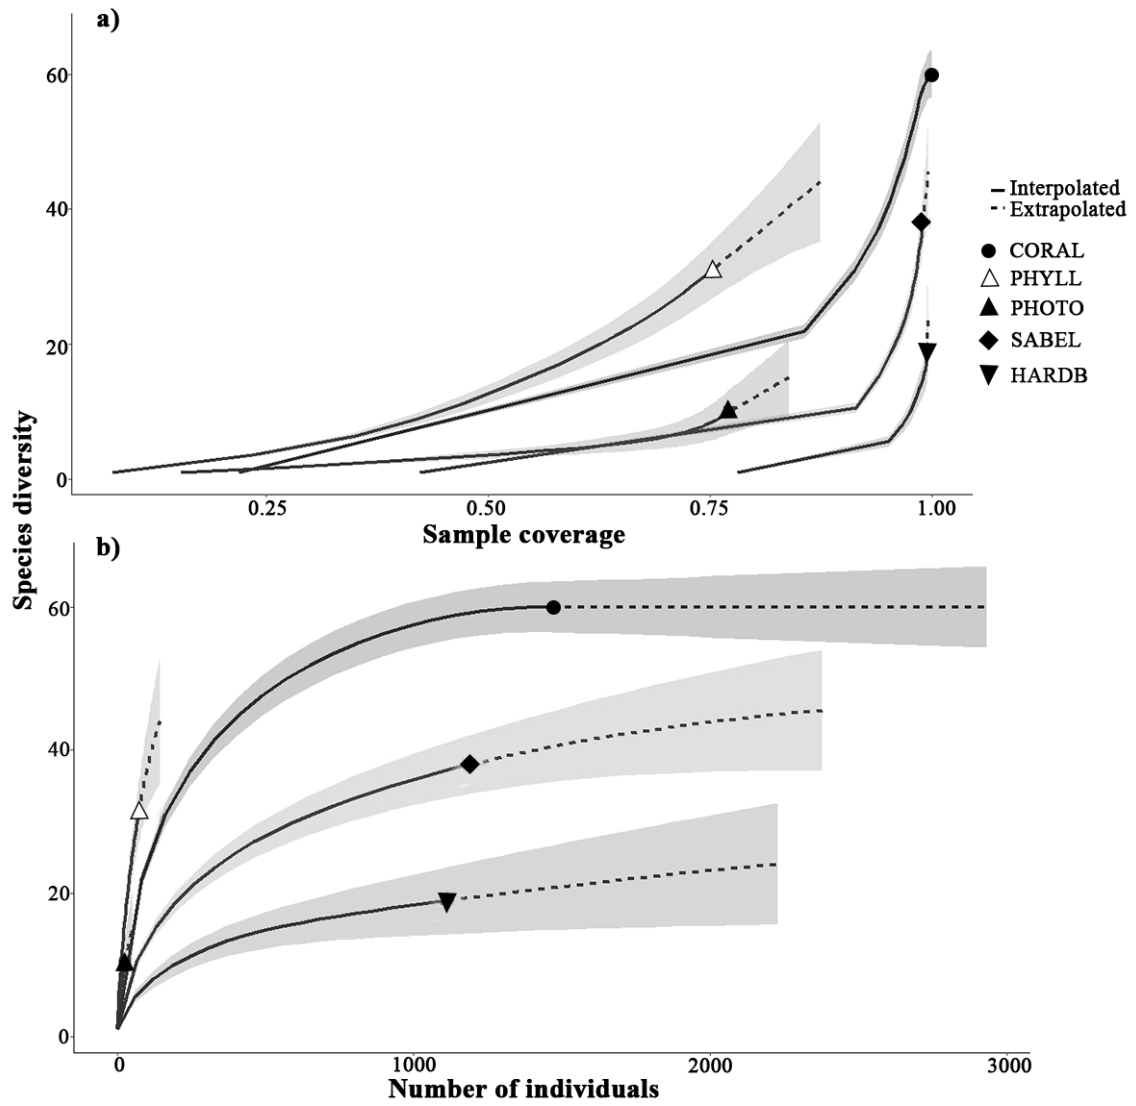

**Figure S2.** Sample-based (a) and individual-based (b) interpolation (rarefaction) and extrapolation curves for the five habitats.
